# Supplementary material for: Sea surface temperature evolution of the North Atlantic Ocean across the Eocene-Oligocene Transition
Source: Copernicus journal article supplement (doi:10.5194/cp-2021-184), 2022-01-25
Supplement: Supplementary file 1 [file cp-2021-184-supplement.zip]

Archive with 2 entries (2 files):
- Supplementary file_Sliwinska_et_al.20211117.xlsx
- Supplementary text_figures_1216.pdf
