# Supplementary material for: Sea surface temperature evolution of the North Atlantic Ocean across the Eocene-Oligocene Transition
Source: Copernicus journal article supplement (doi:10.5194/cp-2021-184), 2022-01-25
Supplement: Supplementary file 1 [file cp-2021-184-supplement.zip › Supplementary text_figures_1216.pdf]

# Sea surface temperature evolution of the Atlantic Ocean across the Eocene-Oligocene Transition

5 Kasia K. Śliwińska<sup>1,2,\*</sup>, Helen K. Coxall<sup>3</sup>, David K. Hutchinson<sup>3,4</sup>, Diederik Liebrand<sup>5</sup>, Stefan Schouten<sup>2,6</sup>, Agatha M. de Boer<sup>3</sup>

<sup>1</sup>Department of Stratigraphy, Geological Survey of Denmark and Greenland (GEUS), Øster Voldgade 10, 1350 Copenhagen, Denmark

10 <sup>2</sup>NIOZ Royal Netherlands Institute for Sea Research, Department of Marine Microbiology and Biogeochemistry, Landsdiep 4, 1797 SZ 't Horntje, Texel, the Netherlands

<sup>3</sup>Department of Geological Sciences, Stockholm University, Svante Arrhenius väg 8, 114 18 Stockholm, Sweden

<sup>4</sup>Climate Change Research Centre, University of New South Wales, Sydney NSW 2052, Australia

<sup>5</sup>National Oceanography Centre, European Way, SO14 3ZH, Southampton, United Kingdom

15 <sup>6</sup>Department of Earth Sciences, Faculty of Geosciences, Utrecht University, Vening Meinesz building A, Princetonlaan 8a, 3584 CB Utrecht, the Netherlands

*Correspondence to:* Kasia K. Śliwińska ([kksl@geus.dk](mailto:kksl@geus.dk))

## 1. Terminology of the Eocene-Oligocene Transition.

In our paper we have applied terminology suggested in the recent review by Hutchinson et al. (Hutchinson et al., 2021). According to the revised definition, the EOT is understood as a phase of accelerated climatic and biotic change that began before and ended after the Eocene-Oligocene boundary (EOB). Stratigraphically the EOT is defined at its base by the extinction of the nannofossil *D. saipanensis* and at its top by the highest values of the benthic  $\delta^{18}\text{O}$  maximum referred to as EOIS, which postdates the base of magnetochron Chron C13n. On the most commonly used current timescale, 'Geological Timescale 2012' (GTS2012; Gradstein et al., 2012), the critical levels are calibrated as follows: extinction of *D. saipanensis* = 34.44 Ma; the EOB = 33.88 Ma (the extinction of *Hantkenina* spp.); the base of Chron C13n at 33.705, and the top of the EOIS = 33.65 Ma. Thus following the revised definition, the EOT has an estimated duration of 790 kyr. Furthermore, under this definition the 'Late Eocene Event' is in the base EOT.

## 2. Lithostratigraphy of Site 647

30 The studied succession belongs to the Lithologic Unit III (Cores 105-647A-15R to 105-647A-55R; 135.4–530.3 mbsf) which is of the middle Eocene to early Oligocene age (Srivastava and Arthur, 1987) (Fig. S1). The Unit III is grayish-green, moderately to strongly bioturbated nannofossil claystone and nannofossil chalk (Srivastava and Arthur, 1987). The Subunit IIIA (Cores 105-647A-15R to 105-647A-22r; 135.4–212.3 mbsf) is rich in nannofossil and diatoms. The Subunit IIIB (Cores 105-647A-23R to 105-647A-25R; 212.3–241.1 mbsf) consists of biogenic claystone containing 25%-50% diatoms and sponge spicules. Calcareous nannofossil are present, but not significant. The Subunit IIIC (Cores 105-647A-26R to 105-647A-55R;

35 241.1–530.3 mbsf) is rich in calcareous nannofossils, on some levels in foraminifers, and yields relatively little biogenic silica. The EOT at Site 647A spans the Subunit IIIC.

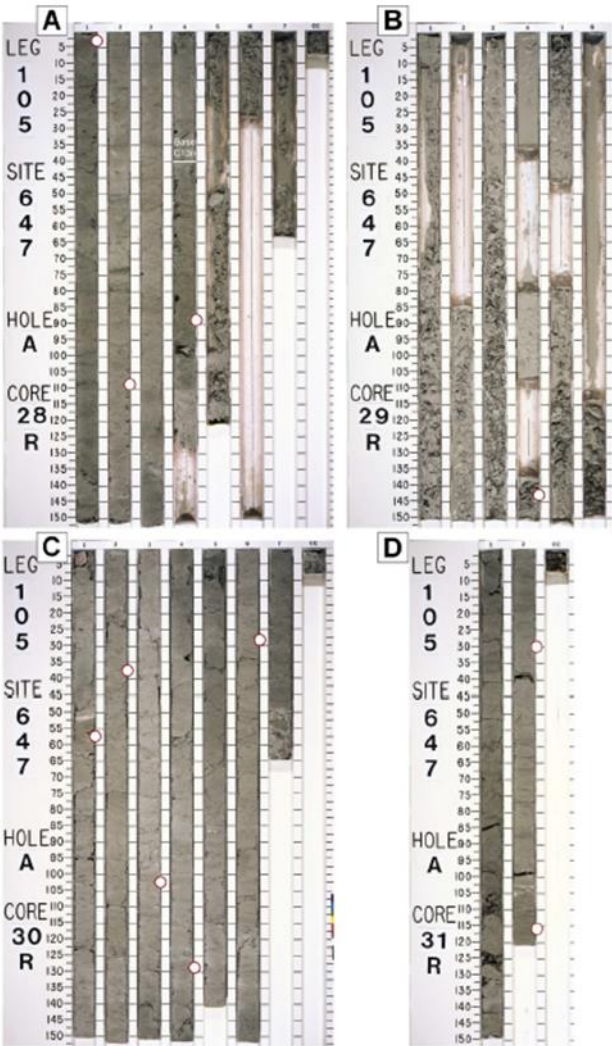

40 **Figure S1:** Photographs of Cores 28 to 31 which span the Eocene-Oligocene Transition (EOT) in the ODP Site 647A. Positioning of samples for organic paleo-thermometry from these three cores are marked with white dots.

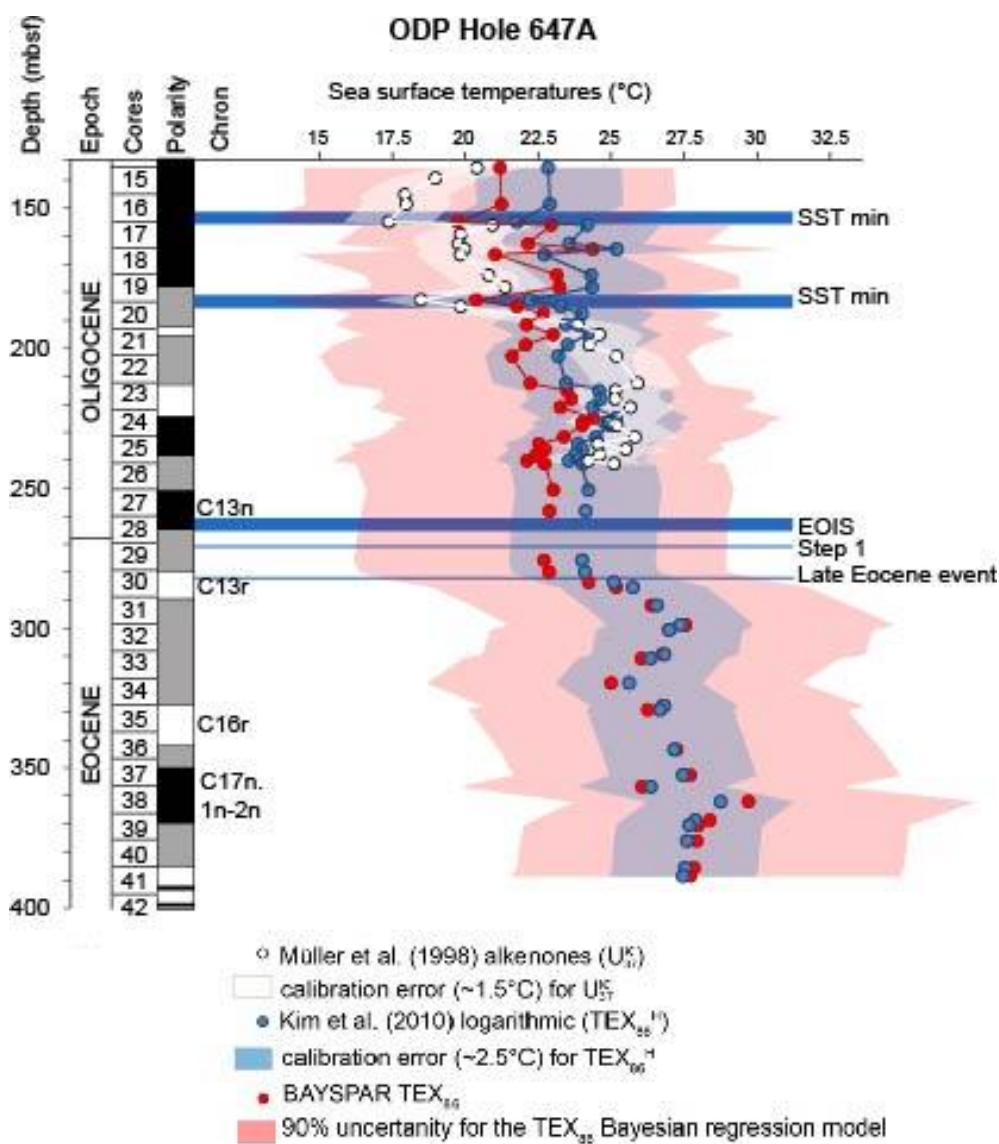

45 **Figure S2:** ODP Site 647: chronostratigraphy (Firth et al., 2013) and temperature data (this study) including calibration errors ( $U_{37}^K$  and  $TEX_{86}^H$ ) and 90% uncertainty bar for the Bayspar  $TEX_{86}$  calibration. Raw data can be found in the Supplementary Information file.

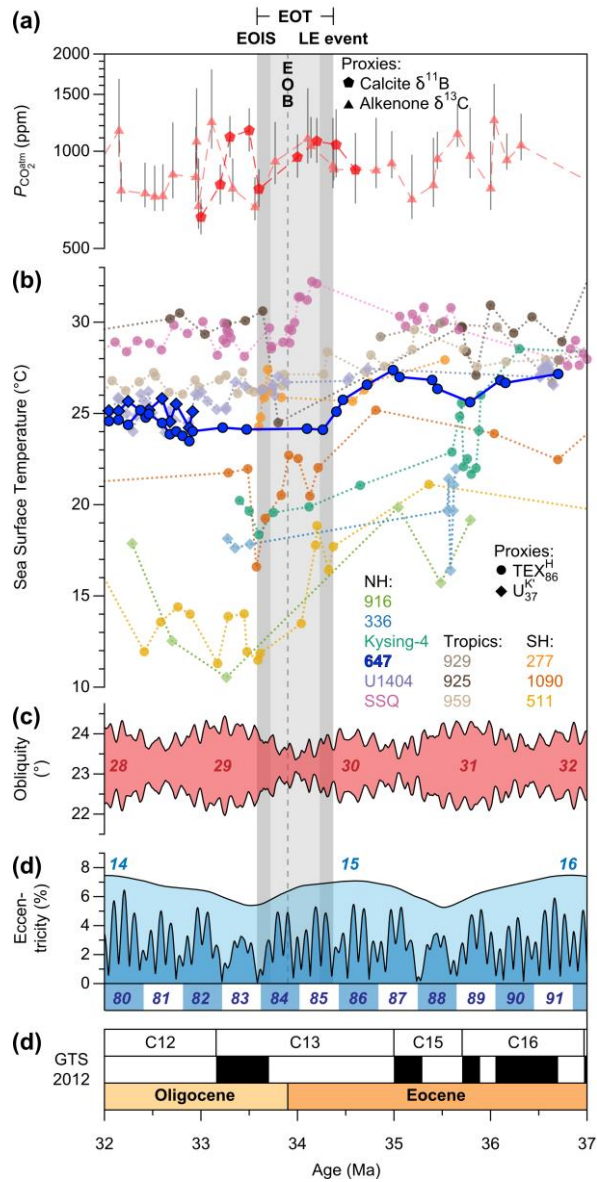

**Figure S3:** Global SST evolution across the EOT. (a) Reconstructed  $P_{CO_2^{atm}}$  based on planktonic foraminiferal  $\delta^{11}B$  (pentagons) (Pearson et al., 2009) and phytoplankton alkenone  $\delta^{13}C$  (triangles) (Pagani et al., 2011; Zhang et al., 2013). The effect of  $P_{CO_2^{atm}}$  on radiative forcing scales logarithmically. (b) Newly generated and published (Liu et al., 2009, 2018; Wade et al., 2012; Inglis et al., 2015; Śliwińska et al., 2019; Houben et al., 2019) reconstructed SSTs based on  $U_{37}^K$  (diamonds) and  $TEX_{86}^H$  (circles) including Pacific Ocean Site 277 (cf. Fig. 3 in the main document). (c) ~1.2 Myr obliquity based astrochronozones. (d) ~2.4 Myr and 405 kyr eccentricity based astrochronozones. (e) Magneto- and chronostratigraphy based on the GTS2012 (Vandenberghe et al., 2012).

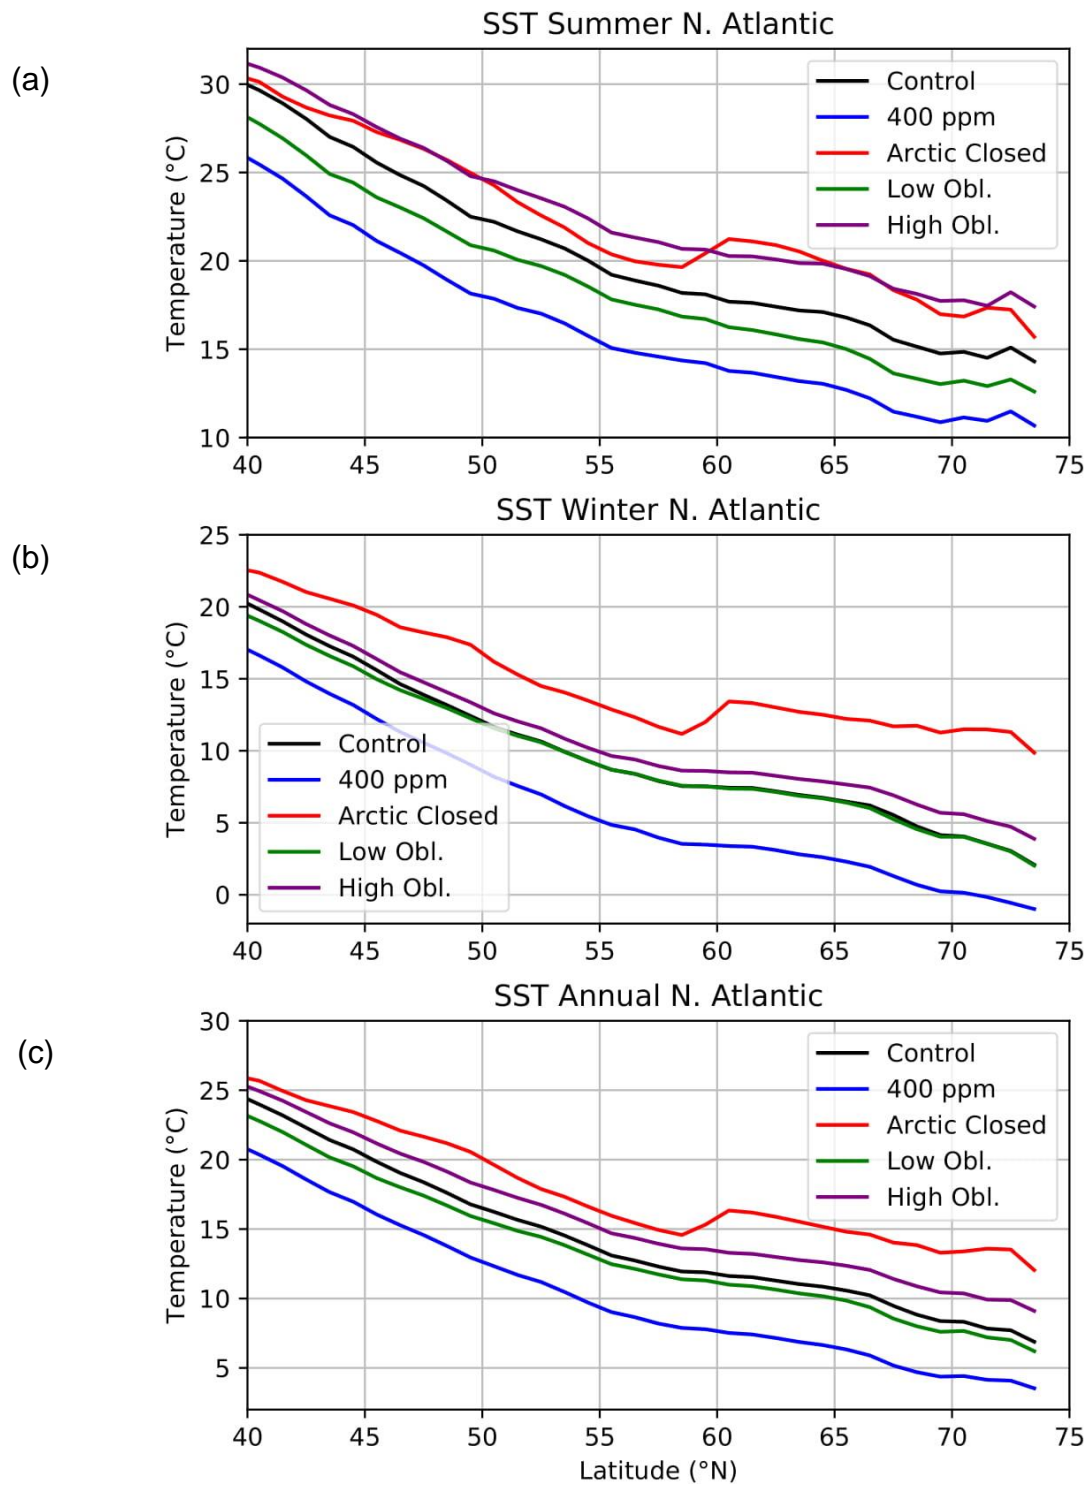

**Figure S4:** Zonal mean SST averages for (a) summer, (b) winter and (c) annual mean.

63  
64  
65  
66  
67  
68  
69  
70  
71  
72  
73  
74  
75  
76  
77  
78  
79  
80  
81  
82  
83  
84  
85  
86  
87  
88  
89  
90  
91  
92  
93  
94  
95  
96  
97  
98  
99  
100

## References:

- Firth, J. V., Eldrett, J.S., Harding, I.C., Coxall, H.K., and Wade, B.S., 2013, Integrated biomagnetochronology for the Palaeogene of ODP Hole 647A: implications for correlating palaeoceanographic events from high to low latitudes: Geological Society, London, Special Publications, v. 373, p. 29–78, doi:10.1144/SP373.9.
- Houben, A.J.P., Quaijtaal, W., Wade, B.S., Schouten, S., and Brinkhuis, H., 2019, Quantitative organic-walled dinoflagellate cyst stratigraphy across the Eocene-Oligocene Transition in the Gulf of Mexico: A record of climate- and sea level change during the onset of Antarctic glaciation: *Newsletters on Stratigraphy*, v. 52, p. 131–154, doi:10.1127/nos/2018/0455.
- Hutchinson, D.K. et al., 2021, The Eocene–Oligocene transition: a review of marine and terrestrial proxy data, models and model–data comparisons: *Climate of the Past*, v. 17, p. 269–315, doi:10.5194/cp-17-269-2021.
- Inglis, G.N. et al., 2015, Descent toward the Icehouse: Eocene sea surface cooling inferred from GDGT distributions: *Paleoceanography*, v. 30, p. 1000–1020, doi:10.1002/2014PA002723.
- Liu, Z., He, Y., Jiang, Y., Wang, H., Liu, W., Bohaty, S.M., and Wilson, P.A., 2018, Transient temperature asymmetry between hemispheres in the Palaeogene Atlantic Ocean: *Nature Geoscience*, doi:10.1038/s41561-018-0182-9.
- Liu, Z., Pagani, M., Zinniker, D., DeConto, R., Huber, M., Brinkhuis, H., Shah, S.R., Leckie, R.M., and Pearson, A., 2009, Global cooling during the Eocene-Oligocene climate transition: *Science*, v. 323, p. 1187–1190, doi:10.1126/science.1166368.
- Pagani, M., Huber, M., Liu, Z., Bohaty, S.M., Henderiks, J., Sijp, W., Krishnan, S., and DeConto, R.M., 2011, The role of carbon dioxide during the onset of antarctic glaciation: *Science*, v. 334, p. 1261–1264, doi:10.1126/science.1203909.
- Pearson, P.N., Foster, G.L., and Wade, B.S., 2009, Atmospheric carbon dioxide through the Eocene–Oligocene climate transition: *Nature*, v. 461, p. 1110–1113.
- Śliwińska, K.K., Thomsen, E., Schouten, S., Schoon, P.L., and Heilmann-Clausen, C., 2019, Climate- and gateway-driven cooling of Late eocene to earliest oligocene sea surface temperatures in the North sea Basin: *Scientific Reports*, p. 1–11, doi:10.1038/s41598-019-41013-7.
- Srivastava, S.P., and Arthur, M.A., 1987, Site 647 ( ODP): Proc. initial reports (part A), ODP, Leg 105, Baffin Bay and Labrador Sea, p. 675–905.
- Vandenbergh, N., Hilgen, F.J., and Speijer, R.P., 2012, The Paleogene Period: 855–921 p., doi:DOI:10.1016/B978-0-444-59425-9.00028-7.
- Wade, B.S., Houben, A.J.P., Quaijtaal, W., Schouten, S., Rosenthal, Y., Miller, K.G., Katz, M.E., Wright, J.D., and Brinkhuis, H., 2012, Multiproxy record of abrupt sea-surface cooling across the Eocene-Oligocene transition in the Gulf of Mexico: *Geology*, v. 40, p. 159–162, doi:10.1130/G32577.1.
- Zhang, Y.G., Pagani, M., Liu, Z., Bohaty, S.M., and DeConto, R., 2013, A 40-million-year history of atmospheric CO<sub>2</sub>: *Philosophical Transactions of the Royal Society A: Mathematical, Physical and Engineering Sciences*, v. 371, <http://rsta.royalsocietypublishing.org/content/371/2001/20130096.abstract>.
