# Supplementary material for: Sea surface temperature evolution of the North Atlantic Ocean across the Eocene-Oligocene Transition
Source: Copernicus journal article supplement (doi:10.5194/cp-2021-184), 2022-01-25
Supplement: Supplementary file 1 [file Supplementary file_Sliwinska_et_al.20211117.xlsx]

## Sheet: 647-age model
Leg/Exp	Site	Hole	Core	Type	Section	Interval (cm)		mbsl	DATUM	GTS2012
						Top	Bottom
Top								135.4	Top C9n
105	647	A	15	R	1	10	20	135.5
105	647	A	15	R	3	80	82	139.2
105	647	A	16	R	1	3	5	145.13
105	647	A	16	R	3	37	39	148.47
105	647	A	17	R	1	0	2	154.8
105	647	A	17	R	1	114	116	155.94
105	647	A	17	R	4	0	2	159.3
105	647	A	17	R	6	34	36	162.64
105	647	A	18	R	1	48	50	164.58
105	647	A	18	R	2	122	124	166.5
105	647	A	19	R	1	9	11	173.89
105	647	A	19	R	3	140	142	178.2	base of normal polarity
105	647	A	19	R	6	133	135	182.63
105	647	A	20	R	2	0	2	185
105	647	A	20	R	3	110	112	187.6
105	647	A	20	R	6	47	49	191.47
								194.16	reverse
105	647	A	21	R	2	40	42	195
105	647	A	21	R	4	108	110	198.68
105	647	A	22	R	1	9	11	202.79
105	647	A	23	R	1	10	12	212.4
								213.58	reverse top
								214.19	HO of Reticulofenestra umbilicus (>14 µm)	32.02
105	647	A	23	R	2	120	122	215		32.0467
105	647	A	23	R	4	120	122	218		32.1462
105	647	A	23	R	6	120	122	221		32.2457
								224.63	top normal
105	647	A	24	R	2	143	145	224.83		32.3727
105	647	A	24	R	4	10	12	226.5		32.4281
105	647	A	24	R	4	108	110	227.48		32.4606
105	647	A	25	R	1	10	12	231.6		32.5972
105	647	A	25	R	2	105	107	234.05		32.6785
105	647	A	25	R	4	0	2	236		32.7431
105	647	A	25	R	5	50	52	238		32.8095
								238.53	base normal?
105	647	A	25	R	CC	5	7	240.1		32.8791
105	647	A	26	R	1	4	6	241.14		32.9136
105	647	A	26	R	1	118	120	242.28		32.9514
105	647	A	27	R	1	13	15	250.53		33.225
								251.15	top normal C13n
105	647	A	27	R	6	12	14	258.02		33.4734
105	647	A	28	R	1	2	4	260.12		33.543
105	647	A	28	R	2	107	109	262.67		33.6276
								265	Base C13n	33.705
105	647	A	28	R	4	89	91	265.49		33.7141
105	647	A	29	R	1	130	132	271		33.9259
105	647	A	29	R	4	130	132	275.5		34.099
105	647	A	29	R	6	30	32	277.5	contamination
105	647	A	30	R	1	57	59	279.77	C13r top	34.2632
105	647	A	30	R	2	35	37	281.25		34.3201
105	647	A	30	R	3	102	104	283.42		34.4035
105	647	A	30	R	4	128	130	285.18		34.4712
105	647	A	30	R	6	28	30	287.18		34.5481
								288.83	C13r base
105	647	A	31	R	2	30	32	290.8		34.6873
105	647	A	31	R	2	116	118	291.66		34.7204
105	647	A	32	R	1	8	10	298.68		34.9903
								299.18	normal
105	647	A	32	R	2	34	36	300.44		35.058
105	647	A	33	R	1	0	2	308.3		35.3602
								308.68	normal
105	647	A	33	R	1	91	94	309.21		35.3952
105	647	A	33	R	2	84	86	310.64		35.4502
105	647	A	34	R	1	143	145	319.43		35.7882
105	647	A	35	R	1	0	2	327.6		36.1023
105	646	A	34	R	1	135	137	328.95		36.1542
105	647	A	35	R	1	138	140	328.98	top C16r	36.1554
105	647	A	35	R	4	54	56	332.64		36.2961
105	647	A	36	R	1	13	15	337.33		36.4764
105	647	A	36	R	2	144	146	338.64		36.5268
								342.35	base C16r	36.6695
105	647	A	36	R	4	147	149	343.17		36.701
105	647	A	37	R	2	88	90	349.08		36.9283
								349.81	Top C17n.1n	36.9692
105	647	A	37	R	4	109	111	352.29
105	647	A	38	R	1	0	2	356.4
105	647	A	38	R	4	85	87	361.75
105	647	A	38	R	CC	12	14	366.22
105	647	A	39	R	2	76	78	368.36
105	647	A	39	R	3	109	111	370.19
105	647	A	40	R	1	12	14	375.82	low concentration of GDGTs
								377.95	base C17n.1n
105	647	A	41	R	1	0	2	385.4
105	647	A	41	R	2	148	150	388.38
105	647	A	41	R	6	141	143	394.31
105	647	A	42	R	2	100	102	397.6
								398.94	Top C18n.1n
									pebbles, not enough material!
									DATUM
									DATUM
									pebbles, not enough material!
									DATUM

## Sheet: TEX86
In yellow: samples removed from TEX86: either BIT or ΔRI too high
Depth [mbsf]	Area 1302	Area 1300	Area 1298	Area 1296	Area 1292	Area 1292'	Area 1050	Area 1036	Area 1022	Area 744	TEX86-H	TEX86-L	BIT	MI	%GDGT-0	Cren'	RI	ΔRI	GDGT-2/GDGT-3	GDGT-0/Cren	GDGT-2/Cren	SST-H	SST-L	SSTTEXH86-only valid data	TEX86-only valid
	GDGT-0	GDGT-1	GDGT-2	GDGT-3	crenarchaeol	crenarchaeol'
135.5	47800000	7580000	6090000	1210000	63700000	3530000	2540000	7930000	30800000	0	0.588267	0.409274	0.39316	0.18122	42.87	0.0525063	2.2501	0.0358517	5.03306	0.750392	0.0956044	22.8389	20.711	22.8389	0.588267
139.2	2770000	425000	318000	66300	3040000	178000	113000	473000	1920000	0	0.569533	0.392932	0.451857	0.200953	47.6764	0.0553139	2.07905	0.149315	4.79638	0.911184	0.104605	21.8775	19.5164
139.2	6780000	1030000	767000	157000	7360000	436000	224000	1070000	4460000	0	0.569038	0.392528	0.438768	0.20041	47.9491	0.0559261	2.07011	0.156755	4.88535	0.921196	0.104212	21.8516	19.4863
145.13	32400000	4620000	3450000	736000	36000000	1990000	1290000	5210000	21700000	0	0.572064	0.391778	0.439252	0.188178	47.3684	0.0523822	2.09213	0.143878	4.6875	0.9	0.0958333	22.0092	19.4302
148.47	9970000	1750000	1420000	292000	12800000	801000	237000	790000	3690000	0	0.589491	0.410168	0.269281	0.202895	43.7857	0.0588927	2.2147	0.0750901	4.86301	0.778906	0.110937	22.9006	20.7749	22.9006	0.589491
154.8	29500000	5020000	3850000	830000	33100000	1910000	560000	1860000	9080000	0	0.567614	0.396907	0.257848	0.216954	47.1246	0.0545558	2.09204	0.130558	4.63855	0.891239	0.116314	21.7772	19.8115	21.7772	0.567614
155.94	11100000	2240000	1970000	434000	17000000	1180000	566000	1120000	5060000	0	0.615385	0.424203	0.28409	0.20347	39.5018	0.0649065	2.36417	0.00926499	4.53917	0.652941	0.115882	24.1776	21.7612	24.1776	0.615385
159.3	14100000	2870000	2580000	576000	22300000	1550000	668000	2640000	13300000	0	0.621172	0.428145	0.426853	0.2017	38.7363	0.0649895	2.39126	0.00147655	4.47917	0.632287	0.115695	24.4557	22.0324
162.66	6370000	1220000	1060000	231000	8400000	553000	188000	771000	3900000	0	0.601828	0.422143	0.366468	0.219033	43.128	0.061767	2.23422	0.0948697	4.58874	0.758333	0.12619	23.5159	21.6185	23.5705	0.602936
162.66	2230000	423000	362000	83300	2940000	200000	78800	277000	1350000	0	0.604044	0.416907	0.36717	0.216626	43.1335	0.0636943	2.23729	0.0989589	4.34574	0.758503	0.123129	23.6251	21.2526
164.58	32000000	6260000	5730000	1430000	56600000	3810000	958000	3570000	18000000	0	0.63668	0.426975	0.284703	0.181769	36.1174	0.063069	2.49126	-0.0457025	4.00699	0.565371	0.101237	25.1882	21.9521	25.1882	0.63668
166.5	29200000	6210000	4880000	1180000	46100000	2720000	1200000	4070000	21200000	0	0.585724	0.397718	0.364751	0.200851	38.7782	0.0557149	2.37889	-0.100897	4.13559	0.633406	0.105857	22.7102	19.8713	22.7102	0.585724
173.89	103000000	23600000	20500000	4540000	196000000	13100000	2280000	9390000	43400000	0	0.617752	0.421464	0.219341	0.188717	34.4482	0.0626495	2.5354	-0.154099	4.51542	0.52551	0.104592	24.2917	21.5713	24.3204	0.617752
173.89	28000000	5430000	4870000	1160000	42800000	2790000	541000	2040000	9760000	0	0.618947	0.424956	0.223808	0.200876	39.548	0.0611976	2.36343	0.0218555	4.19828	0.654206	0.113785	24.3491	21.8132
178.2	55100000	10600000	9450000	2280000	90900000	6420000	1250000	6200000	30400000	0	0.631304	0.423197	0.293981	0.186628	37.7397	0.0659679	2.43559	-0.00852806	4.14474	0.606161	0.10396	24.9363	21.6917	24.3482	0.61905
178.2	19600000	3610000	3100000	741000	26700000	1730000	409000	2060000	9980000	0	0.606797	0.416052	0.31799	0.207659	42.3326	0.0608512	2.2666	0.078602	4.18354	0.734082	0.116105	23.7602	21.1924
182.63	27800000	4630000	3630000	912000	34700000	1890000	360000	1730000	8200000	0	0.58145	0.39577	0.228717	0.200428	44.48	0.0516535	2.18844	0.0762831	3.98026	0.801153	0.104611	22.4926	19.7274	22.2138	0.576044
182.63	9310000	1550000	1190000	293000	11200000	577000	155000	553000	2740000	0	0.570637	0.392351	0.23539	0.204794	45.3925	0.0489938	2.15245	0.079244	4.06143	0.83125	0.10625	21.935	19.473
185	27300000	4500000	3490000	866000	36700000	1980000	331000	1160000	5130000	0	0.584718	0.394083	0.152836	0.186301	42.6562	0.0511892	2.25557	0.0192856	4.03002	0.743869	0.0950954	22.6591	19.6022	23.2805	0.597208
185	170000000	29300000	24700000	6270000	265000000	14800000	2160000	7870000	35500000	0	0.609698	0.409822	0.14662	0.177228	39.0805	0.0528949	2.38538	-0.0306981	3.93939	0.641509	0.0932075	23.9018	20.7502
187.6	16700000	3040000	2660000	646000	24100000	1470000	422000	1580000	7360000	0	0.611054	0.419162	0.27978	0.198834	40.9314	0.0574892	2.31566	0.0434766	4.11765	0.692946	0.110373	23.9679	21.4108	23.9927	0.611054
187.6	45300000	8160000	6980000	1760000	67300000	4070000	1280000	4210000	19900000	0	0.610873	0.413018	0.273924	0.191458	40.2309	0.0570268	2.34244	0.0160951	3.96591	0.673105	0.103715	23.959	20.9779
187.6	11800000	2110000	1810000	459000	16800000	1070000	288000	1120000	5250000	0	0.612773	0.413336	0.283826	0.196818	41.2587	0.0598769	2.30806	0.056738	3.94336	0.702381	0.107738	24.0513	21.0005
191.47	34500000	6430000	5360000	1450000	48900000	2920000	729000	2590000	13800000	0	0.602104	0.404834	0.259304	0.203504	41.3669	0.0563489	2.29791	0.032066	3.69655	0.705521	0.109611	23.5295	20.3912	23.448	0.602104
191.47	15100000	2830000	2350000	634000	21500000	1240000	469000	1130000	5920000	0	0.598809	0.404197	0.259106	0.203614	41.2568	0.0545295	2.29972	0.0196569	3.70662	0.702326	0.109302	23.3665	20.345
195	26000000	5090000	4470000	1160000	39400000	2560000	762000	2820000	13700000	0	0.616717	0.416978	0.304894	0.203493	39.7554	0.0610105	2.35574	0.022111	3.85345	0.659898	0.113452	24.2419	21.2576	24.2419	0.616717
198.68	12000000	2210000	1860000	481000	16800000	997000	172000	896000	4740000	0	0.601658	0.408701	0.2569	0.203642	41.6667	0.0560207	2.28721	0.0413314	3.86694	0.714286	0.110714	23.5075	20.6699	23.5075	0.601658
202.77	16900000	2890000	2390000	576000	21100000	1260000	196000	995000	4350000	0	0.593873	0.408128	0.207988	0.207542	44.4737	0.0563506	2.19075	0.11288	4.14931	0.800948	0.11327	23.1206	20.6288	23.1867	0.595196
202.77	5860000	997000	832000	200000	7200000	442000	105000	373000	1620000	0	0.59652	0.410054	0.22564	0.209803	44.8698	0.0578383	2.17816	0.133894	4.16	0.813889	0.115556	23.2527	20.7668
212.4	29000000	5160000	4410000	1100000	37500000	2370000	603000	2180000	9720000	0	0.604294	0.413308	0.250045	0.21112	43.609	0.0594432	2.22228	0.114786	4.00909	0.773333	0.1176	23.6374	20.9985	23.4607	0.604294
212.4	12600000	2260000	1890000	479000	15700000	981000	283000	958000	4160000	0	0.597148	0.408296	0.255959	0.217222	44.523	0.0588094	2.18817	0.125886	3.94572	0.802548	0.120382	23.284	20.6408
215	9070000	1740000	1630000	392000	13100000	844000	248000	849000	4350000	0	0.622232	0.43328	0.293686	0.21247	40.9111	0.0605278	2.31371	0.0825804	4.15816	0.692366	0.124427	24.5063	22.3819	24.581	0.6238
215	45900000	8890000	8340000	1980000	70800000	4520000	1230000	4490000	22700000	0	0.625369	0.434149	0.286434	0.203216	39.3316	0.0600106	2.36979	0.037079	4.21212	0.648305	0.117797	24.6557	22.4406
218	25500000	5180000	4800000	1150000	35700000	2690000	936000	3810000	19300000	0	0.625181	0.431267	0.40247	0.224758	41.6667	0.0700703	2.28992	0.116314	4.17391	0.714286	0.134454	24.6468	22.2454	24.6468	0.625181
221	19000000	3780000	3450000	755000	27400000	1950000	825000	2920000	14500000	0	0.619527	0.43206	0.399715	0.213874	40.9483	0.0664395	2.31375	0.0734773	4.56954	0.693431	0.125912	24.3769	22.2992	24.3769	0.619527
224.83	19200000	4460000	4360000	967000	32100000	2480000	560000	2270000	11300000	0	0.636423	0.445489	0.305646	0.220592	37.4269	0.0717178	2.42895	0.0157187	4.50879	0.598131	0.135826	25.1762	23.1965	25.1762	0.636423
226.5	56500000	12300000	11800000	2570000	91900000	6610000	1500000	5780000	27600000	0	0.630409	0.442445	0.275122	0.213053	38.0728	0.0670998	2.40891	0.0150976	4.59144	0.614799	0.1284	24.8942	22.9955	24.777	0.630409
226.5	11700000	2560000	2450000	535000	18300000	1290000	407000	1150000	5660000	0	0.625457	0.441839	0.282831	0.220609	39	0.0658499	2.37342	0.033749	4.57944	0.639344	0.13388	24.6599	22.9554
227.48	15700000	3440000	3370000	749000	25300000	1770000	358000	1260000	5990000	0	0.631257	0.445826	0.23119	0.218285	38.2927	0.065386	2.39836	0.0285461	4.49933	0.620553	0.133202	24.9341	23.2187	24.9687	0.631257
227.48	44500000	10100000	9790000	2180000	77600000	5430000	980000	3750000	17800000	0	0.632727	0.443589	0.225007	0.20999	36.4455	0.065398	2.46217	-0.0302244	4.49083	0.573454	0.12616	25.0032	23.0712
231.6	15600000	3200000	3000000	688000	22300000	1570000	752000	2280000	11900000	0	0.62166	0.43554	0.401053	0.223942	41.1609	0.0657729	2.3026	0.0917712	4.36047	0.699552	0.134529	24.479	22.5344	24.479	0.62166
234.05	30600000	6020000	5290000	1120000	44900000	2960000	961000	2590000	11600000	0	0.608837	0.425583	0.252302	0.20617	40.5298	0.0618471	2.32589	0.0259726	4.72321	0.681514	0.117817	23.8599	21.8565	23.8599	0.608837
236	20000000	4100000	3660000	817000	29300000	1990000	535000	2300000	10500000	0	0.612	0.426723	0.312771	0.21514	40.568	0.0635986	2.32233	0.0399137	4.4798	0.682594	0.124915	24.0138	21.9348	24.0138	0.612
238	24600000	4590000	4010000	851000	34500000	2230000	849000	3150000	14000000	0	0.607054	0.424294	0.342845	0.204651	41.6244	0.0607133	2.28992	0.0561149	4.7121	0.713043	0.116232	23.7728	21.7675	23.7728	0.607054
240.1	132000000	24100000	20900000	4480000	180000000	11600000	3640000	13300000	73500000	0	0.605435	0.422393	0.334418	0.205243	42.3077	0.0605428	2.26691	0.0738545	4.66518	0.733333	0.116111	23.6934	21.6359	23.5523	0.602569
240.1	8730000	1540000	1330000	308000	11100000	694000	203000	752000	4320000	0	0.602273	0.418502	0.322137	0.212263	44.0242	0.0588435	2.20656	0.123957	4.31818	0.786486	0.11982	23.5379	21.3646
240.1	3650000	654000	564000	132000	4650000	285000	90500	343000	1900000	0	0.6	0.417778	0.334145	0.214797	43.9759	0.0577508	2.20614	0.11706	4.27273	0.784946	0.12129	23.4255	21.3138
241.14	15500000	3020000	2700000	616000	21200000	1450000	395000	1550000	8120000	0	0.612124	0.426136	0.321925	0.218588	42.2343	0.0640177	2.26741	0.0952456	4.38312	0.731132	0.127358	24.0198	21.8945	24.0198	0.612124
242.28	21500000	3070000	2880000	663000	23600000	1540000	522000	1760000	11200000	0	0.623451	0.435506	0.363573	0.208264	47.6718	0.061257	2.09151	0.308892	4.34389	0.911017	0.122034	24.5645	22.5321
250.53	14700000	2760000	2470000	593000	20800000	1370000	377000	1280000	6380000	0	0.616294	0.42418	0.278704	0.208016	41.4085	0.0617952	2.29918	0.0772666	4.16526	0.706731	0.11875	24.2215	21.7596	24.2215	0.616294
258.02	18100000	3420000	3080000	726000	25800000	1640000	500000	1860000	9380000	0	0.614257	0.426239	0.312733	0.208446	41.2301	0.0597668	2.30296	0.0667356	4.24242	0.70155	0.11938	24.1231	21.9016	24.1231	0.614257
260.12	11400000	1990000	1710000	377000	12700000	833000	362000	1590000	8220000	0	0.594705	0.419426	0.444736	0.231516	47.3029	0.0615532	2.09145	0.214823	4.53581	0.897638	0.134646	23.1622	21.4292
262.67	31500000	4700000	4350000	1060000	33600000	2090000	1000000	5450000	31700000	0	0.614754	0.430267	0.531707	0.220742	48.3871	0.0585598	2.06132	0.310023	4.10377	0.9375	0.129464	24.1472	22.1773
265.49	60800000	8140000	7290000	1880000	57700000	3600000	1610000	4820000	30300000	0	0.610713	0.421144	0.388965	0.220201	51.308	0.0587276	1.96227	0.395742	3.87766	1.05373	0.126343	23.9512	21.5491
275.64	34500000	6120000	5390000	1230000	48800000	3160000	1330000	5040000	24600000	0	0.615094	0.423077	0.388241	0.196909	41.4166	0.060816	2.30272	0.0697479	4.38211	0.706967	0.110451	24.1636	21.6833	24.0099	0.611928
275.64	28000000	5090000	4350000	1020000	40500000	2550000	1080000	3900000	20000000	0	0.608762	0.41587	0.381491	0.195477	40.8759	0.0592334	2.31935	0.0322702	4.26471	0.691358	0.107407	23.8562	21.1796
279.77	120000000	22600000	19500000	4930000	183000000	11500000	1270000	2830000	12400000	0	0.613873	0.414629	0.0827068	0.194717	39.604	0.059126	2.36326	0.00516585	3.95538	0.655738	0.106557	24.1046	21.092	24.1046	0.613873
281.25	43000000	7140000	6790000	1480000	54700000	4470000	2760000	7910000	41100000	0	0.640845	0.440623	0.48624	0.206624	44.0123	0.075545	2.22691	0.233106	4.58784	0.786106	0.124132	25.3819	22.8745
283.42	36100000	6930000	6450000	1390000	54100000	4200000	1200000	3260000	17000000	0	0.634686	0.436696	0.284013	0.202135	40.0222	0.0720412	2.35596	0.0827178	4.64029	0.667283	0.119224	25.095	22.6121	25.095	0.634686
285.18	56700000	10300000	10500000	2020000	75300000	6500000	3350000	7550000	39300000	0	0.648704	0.460123	0.4	0.218123	42.9545	0.0794621	2.25986	0.227754	5.19802	0.752988	0.139442	25.744	24.144	25.744	0.648704
287.18	34200000	7100000	7520000	1590000	57800000	5230000	2160000	6050000	37900000	0	0.668843	0.463911	0.443749	0.204568	37.1739	0.0829764	2.45971	0.100483	4.72956	0.591696	0.130104	26.6522	24.3844
290.8	57000000	7370000	8180000	1920000	62400000	5040000	1910000	6220000	44000000	0	0.67259	0.468231	0.455165	0.205747	47.7387	0.0747331	2.10873	0.465267	4.26042	0.913462	0.13109	26.8181	24.6561
291.66	237000000	50800000	54300000	14100000	329000000	34500000	5230000	15700000	89300000	0	0.669486	0.455537	0.250962	0.246944	41.8728	0.0949106	2.30054	0.262016	3.85106	0.720365	0.165046	26.6807	23.8503	26.5711	0.667025
291.66	57800000	11700000	12400000	3190000	94700000	7590000	1060000	3630000	19900000	0	0.664564	0.454379	0.206136	0.210603	37.9016	0.0742008	2.42945	0.115101	3.88715	0.610348	0.13094	26.4615	23.7757
298.68	94500000	20300000	22700000	6600000	180000000	14900000	2140000	8110000	46300000	0	0.685271	0.457661	0.239062	0.202863	34.4262	0.0764495	2.55192	0.069485	3.43939	0.525	0.126111	27.373	23.9867	27.373	0.685271
300.44	30300000	5410000	5930000	1440000	45300000	3950000	1270000	2890000	18200000	0	0.676629	0.464006	0.330476	0.206029	40.0794	0.080203	2.36749	0.221494	4.11806	0.668874	0.130905	26.996	24.3904	26.996	0.676629
308.3	40000000	7490000	7900000	1980000	61600000	4670000	1830000	6100000	39200000	0	0.660163	0.454807	0.433459	0.207676	39.3701	0.0704693	2.38038	0.148204	3.9899	0.649351	0.128247	26.2642	23.8033
309.21	33900000	7200000	7650000	1950000	60800000	5210000	799000	2520000	15900000	0	0.672876	0.455357	0.24018	0.202874	35.7973	0.0789274	2.50527	0.0697861	3.92308	0.557566	0.125822	26.8308	23.8388	26.8308	0.672876
310.64	115000000	18200000	19000000	4650000	156000000	12000000	2780000	7840000	46600000	0	0.662024	0.454002	0.268361	0.199428	42.4354	0.0714286	2.28459	0.250725	4.08602	0.737179	0.121795	26.3478	23.7514	26.3478	0.662024
319.43	77000000	16500000	16400000	4170000	135000000	9540000	2170000	6310000	33500000	0	0.645999	0.442406	0.237202	0.204119	36.3208	0.0660025	2.47465	0.00341164	3.93285	0.57037	0.121481	25.6198	22.9929	25.6198	0.645999
327.6	47500000	9360000	9640000	2940000	83200000	6650000	1160000	3110000	17500000	0	0.672613	0.43938	0.207393	0.196261	36.3428	0.0740122	2.49143	0.0826519	3.27891	0.570913	0.115865	26.8191	22.7917	26.8191	0.672613
328.95	10200000	2100000	2180000	541000	16800000	1450000	498000	1290000	9430000	0	0.665125	0.452188	0.400385	0.208964	37.7778	0.0794521	2.43705	0.109546	4.02957	0.607143	0.129762	26.4866	23.6341	26.6753	0.665125
328.98	37600000	5780000	6090000	1570000	48600000	4270000	1280000	3330000	21200000	0	0.673631	0.453125	0.346862	0.202684	43.6195	0.0807641	2.25339	0.324456	3.87898	0.773663	0.125309	26.8641	23.6947
332.64	12800000	1200000	1190000	301000	9620000	823000	360000	1160000	8290000	0	0.658509	0.442215	0.504889	0.204888	57.0919	0.0788088	1.78357	0.739047	3.95349	1.33056	0.123701	26.1896	22.9802
337.33	149000000	10400000	10700000	2670000	88500000	7210000	1780000	5130000	29100000	0	0.6643	0.450147	0.289214	0.198945	62.7368	0.0753317	1.57423	0.969352	4.00749	1.68362	0.120904	26.4497	23.5014
338.64	31500000	4060000	3580000	939000	30000000	2570000	622000	1970000	15000000	0	0.635842	0.417298	0.369642	0.208486	51.2195	0.078907	1.9865	0.456164	3.81257	1.05	0.119333	25.1491	21.2801
343.17	10400000	2550000	2650000	760000	22700000	2020000	414000	1620000	10100000	0	0.680451	0.444631	0.348338	0.194263	31.4199	0.0817152	2.6536	-0.0503445	3.48684	0.45815	0.11674	27.1633	23.14	27.1633	0.680451
349.08	9330000	2380000	2730000	688000	19900000	1960000	515000	1930000	13500000	0	0.69322	0.470852	0.444832	0.209632	31.9193	0.0896615	2.63177	0.0198869	3.96802	0.468844	0.137186	27.7156	24.8197
352.29	18100000	4960000	5350000	1490000	45400000	4060000	799000	2540000	17200000	0	0.687264	0.45339	0.311485	0.192622	28.5039	0.0820865	2.7466	-0.117651	3.5906	0.398678	0.117841	27.4592	23.7118	27.4592	0.687264
356.4	70700000	13300000	13700000	3670000	112000000	8730000	1390000	4910000	27800000	0	0.662437	0.446691	0.233402	0.202576	38.6973	0.0723101	2.40716	0.129655	3.73297	0.63125	0.122321	26.3663	23.2755	26.3663	0.662437
361.75	5360000	1470000	1780000	497000	15300000	1460000	322000	1220000	8180000	0	0.717688	0.475047	0.388538	0.182718	25.9439	0.0871122	2.84382	-0.0963848	3.58149	0.350327	0.11634	28.746	25.0797	28.746	0.717688
366.12	10300000	1140000	1150000	311000	9270000	819000	364000	1350000	10200000	0	0.666667	0.442138	0.562406	0.204965	52.6316	0.0811775	1.94559	0.606637	3.69775	1.11111	0.124056	26.5554	22.9751
368.36	13800000	3560000	4060000	1190000	36100000	2950000	449000	1280000	8410000	0	0.697279	0.46084	0.219274	0.184079	27.6553	0.0755442	2.78057	-0.113299	3.41176	0.382271	0.112465	27.889	24.1896	27.889	0.697279
370.19	11800000	3150000	3510000	941000	27500000	2630000	522000	1840000	11700000	0	0.692112	0.461781	0.338338	0.201452	30.0254	0.0872884	2.69554	-0.0481265	3.73007	0.429091	0.127636	27.6681	24.2495	27.6681	0.692112
375.82	39700000	6340000	6910000	2470000	57100000	4760000	950000	2930000	18000000	0	0.69043	0.439567	0.277032	0.20263	41.0124	0.0769479	2.3449	0.296089	2.79757	0.695271	0.121016	27.5958	22.8042	27.5958	0.69043
385.4	30100000	6470000	7210000	2010000	57600000	5110000	759000	2650000	16100000	0	0.688942	0.459528	0.253005	0.200128	34.3216	0.0814862	2.56	0.0753242	3.58706	0.522569	0.125174	27.5317	24.1061	27.5317	0.688942
388.38	9260000	2340000	2560000	663000	21600000	1920000	359000	1040000	6650000	0	0.687291	0.460183	0.271476	0.19128	30.0065	0.0816327	2.70008	-0.0710242	3.86124	0.428704	0.118519	27.4604	24.1478	27.4604	0.687291
394.31	1510000	344000	348000	83400	2860000	254000	138000	400000	2550000	0	0.665825	0.448801	0.519166	0.199362	34.5538	0.0815671	2.54588	0.00327051	4.17266	0.527972	0.121678	26.5178	23.4136
397.6	1840000	414000	425000	97300	3350000	289000	188000	532000	3870000	0	0.662124	0.453914	0.578086	0.204642	35.4528	0.0794174	2.51148	0.0241978	4.36793	0.549254	0.126866	26.3522	23.7457

## Sheet: BAYSPAR
TEX86-only valid	depth (mbsf)					Inputs			Depth	TEX86	5th	50th	95th
0.588267	135.5					Prior Mean	0.633639		135.5	0.588267	14.4657	21.195	27.1156
0.589491	148.47					Prior STD	20		148.47	0.589491	14.5354	21.2401	27.2271
0.567614	154.8					Search Tolerance	0.0723022		154.8	0.567614	12.9276	19.7426	25.4894
0.615385	155.94					Number of Samples	2000		155.94	0.615385	16.5069	22.944	29.0907
0.602936	162.66					Site Location	(45.0;-45.0)		162.66	0.602936	15.5837	22.1554	28.2025
0.63668	164.58					Analog Location	(110.0;20.0)		164.58	0.63668	18.011	24.3714	30.6944
0.585724	166.5						(110.0;0.0)		166.5	0.585724	14.3556	21.0247	26.9657
0.617752	173.89						(-10.0;20.0)		173.89	0.617752	16.6068	23.1339	29.3504
0.61905	178.2						(-90.0;0.0)		178.2	0.61905	16.8012	23.232	29.4214
0.576044	182.63						(10.0;0.0)		182.63	0.576044	13.5823	20.3676	26.258
0.597208	185						(-50.0;0.0)		185	0.597208	15.1394	21.7677	27.72
0.611054	187.6						(-30.0;0.0)		187.6	0.611054	16.1372	22.6758	28.804
0.602104	191.47						(-10.0;40.0)		191.47	0.602104	15.5474	22.102	28.1335
0.616717	195						(-50.0;-20.0)		195	0.616717	16.5762	23.0193	29.2171
0.601658	198.68						(130.0;20.0)		198.68	0.601658	15.5071	22.0719	28.0942
0.595196	202.77						(150.0;0.0)		202.77	0.595196	15.0106	21.6095	27.5576
0.604294	212.4						(50.0;-20.0)		212.4	0.604294	15.6699	22.2348	28.2439
0.6238	215						(130.0;0.0)		215	0.6238	17.1404	23.4947	29.7689
0.625181	218						(170.0;0.0)		218	0.625181	17.2339	23.6355	29.9435
0.619527	221						(-30.0;-20.0)		221	0.619527	16.8167	23.2577	29.4485
0.636423	224.83						(-10.0;0.0)		224.83	0.636423	18.0095	24.3838	30.8345
0.630409	226.5						(-90.0;20.0)		226.5	0.630409	17.5647	24.0108	30.3534
0.631257	227.48						(-70.0;20.0)		227.48	0.631257	17.6528	24.0128	30.3532
0.62166	231.6						(150.0;-20.0)		231.6	0.62166	17.0018	23.381	29.5875
0.608837	234.05						(-170.0;0.0)		234.05	0.608837	16.0615	22.5262	28.6699
0.612	236						(-30.0;20.0)		236	0.612	16.2602	22.7327	28.8637
0.607054	238						(110.0;-20.0)		238	0.607054	15.8364	22.4275	28.4353
0.602569	240.1								240.1	0.602569	15.5	22.1133	28.2087
0.612124	241.14								241.14	0.612124	16.257	22.7253	28.8864
0.616294	250.53								250.53	0.616294	16.6181	23.0219	29.1997
0.614257	258.02								258.02	0.614257	16.449	22.8872	29.0101
0.611928	275.64								275.64	0.611928	16.1889	22.7014	28.9315
0.613873	279.77								279.77	0.613873	16.3929	22.8706	28.9395
0.634686	283.42								283.42	0.634686	17.8849	24.2319	30.6349
0.648704	285.18								285.18	0.648704	18.9044	25.1786	31.696
0.667025	291.66								291.66	0.667025	20.2562	26.3765	33.1842
0.685271	298.68								298.68	0.685271	21.5181	27.5556	34.6845
0.676629	300.44								300.44	0.676629	20.8813	26.9871	33.9729
0.672876	309.21								309.21	0.672876	20.5885	26.7517	33.6752
0.662024	310.64								310.64	0.662024	19.9406	26.0318	32.8129
0.645999	319.43								319.43	0.645999	18.7018	24.9943	31.4969
0.672613	327.6								327.6	0.672613	20.6332	26.7547	33.6747
0.665125	328.95								328.95	0.665125	20.1119	26.2604	33.0567
0.680451	343.17								343.17	0.680451	21.1744	27.2457	34.261
0.687264	352.29								352.29	0.687264	21.67	27.7108	34.8956
0.662437	356.4								356.4	0.662437	19.8493	26.0644	32.855
0.717688	361.75								361.75	0.717688	23.7282	29.7111	37.4408
0.697279	368.36								368.36	0.697279	22.3873	28.3819	35.6942
0.692112	370.19								370.19	0.692112	22.0199	27.9907	35.1717
0.69043	375.82								375.82	0.69043	21.8844	27.9307	35.1442
0.688942	385.4								385.4	0.688942	21.7845	27.838	35.0113
0.687291	388.38								388.38	0.687291	21.5738	27.7118	34.9079
0.633639		0.633639
0.0361511	0.0723022	0.0723022

## Sheet: UK37
Sample name	rt 37:3	area 37:3	rt 37:2	area 37:2	UK37"	SST(Muller)		SAMPLE	depth (mbsf)	avg_Uk37_SST		UK-n	UK-p
647A_C15_S1	48.88	111393	49.26	282745	0.717375	20.4053		647A_C15_S1	135.5	20.4053		18.9053	21.9053
647A_C15_S3	50.64	34788.4	51.03	70289	0.668926	18.9372		647A_C15_S3	139.2	18.9845		17.4845	20.4845
647A_C15_S3	50.26	127883	50.66	262065	0.67205	19.0318		647A_C16_S1	145.13	17.937		16.437	19.437
647A_C16_S1	48.88	191389	49.25	334288	0.635919	17.937		647A_C16_S3	148.47	17.9832		16.4832	19.4832
647A_C16_S3	50.62	21570.6	51	39070.1	0.644289	18.1906		647A_C17_S1_0	154.8	17.3772		15.8772	18.8772
647A_C16_S3	50.26	57309.6	50.64	97832.7	0.6306	17.7758		647A_C17_S1_114	155.94	20.9251		19.4251	22.4251
647A_C17_S1_0	48.86	92069	49.21	148602	0.617449	17.3772		647A_C17_S4	159.3	19.8405		18.3405	21.3405
647A_C17_S1_114	48.85	24660.1	49.21	68232.1	0.73453	20.9251		647A_C17_S6	162.66	19.7632		18.2632	21.2632
647A_C17_S4	48.85	21891.9	49.21	50775.1	0.698737	19.8405		647A_C18_S1	164.58	19.9768		18.4768	21.4768
647A_C17_S6	50.6	18201.1	50.99	42225.2	0.698788	19.8421		647A_C18_S2	166.5	19.8354		18.3354	21.3354
647A_C17_S6	50.19	31626.2	50.58	71586.8	0.693583	19.6843		647A_C19_S1	173.89	20.8013		19.3013	22.3013
647A_C18_S1	48.83	56914.6	49.19	134868	0.703234	19.9768		647A-C19_S3	178.2	21.3732		19.8732	22.8732
647A_C18_S2	48.82	19114.6	49.18	44297.9	0.698567	19.8354		647A_C19_S6	182.63	18.4829		16.9829	19.9829
647A_C19_S1	48.84	86911.8	49.21	235514	0.730444	20.8013		647A_C20_S2	185	19.8397		18.3397	21.3397
647A_C19_S3	48.82	46067.6	49.19	137699	0.749315	21.3732		647A_C20_S6	191.47	23.8581		22.3581	25.3581
647A_C19_S6	50.65	26277.5	51.02	48886.1	0.650396	18.3756		647A_C21_S2	195	24.6016		23.1016	26.1016
647A_C19_S6	50.26	110849	50.63	212775	0.657476	18.5902		647A_C21_S4	198.68	24.2526		22.7526	25.7526
647A_C20_S2	48.86	149664	49.23	347079	0.69871	19.8397		647A_C22_S1	202.77	25.1831		23.6831	26.6831
647A_C20_S6	48.82	35064	49.19	172806	0.831317	23.8581		647A_C23_S1	212.4	25.9171		24.4171	27.4171
647A_C21_S2	48.82	35850.9	49.2	212858	0.855852	24.6016		647A_C23_S2	215	25.1448		23.6448	26.6448
647A_C21_S4	50.62	6274.03	51	35117.5	0.848422	24.3764		647A_C23_S4	218	25.1352		23.6352	26.6352
647A_C21_S4	50.23	11402.7	50.61	59975.5	0.84025	24.1288		647A_C23_S6	221	25.6569		24.1569	27.1569
647A_C22_S1	50.62	2810.05	51	20709.8	0.880524	25.3492		647A_C24_S1_10	226.5	24.9325		23.4325	26.4325
647A_C22_S1	50.26	24831.8	50.66	165540	0.869561	25.017		647A_C24_S1_108	227.48	25.1949		23.6949	26.6949
647A_C23_S1	48.8	11681	49.17	104276	0.899264	25.9171		647A_C25_S1	231.6	25.8149		24.3149	27.3149
647A_C23_S2	48.81	42388.7	49.2	293438	0.873778	25.1448		647A_C25_S2	234.05	24.549		23.049	26.049
647A_C23_S4	48.74	21605.3	49.11	149137	0.873463	25.1352		647A_C25_S4	236	25.5108		24.0108	27.0108
647A_C23_S6	48.73	19754	49.11	160939	0.890677	25.6569		647A_C25_S5	238	24.6093		23.1093	26.1093
647A_C24_S1_10	48.71	24281.5	49.08	157973	0.866771	24.9325		647A_C25_CC	240.1	24.2144		22.7144	25.7144
647A_C24_S1_108	48.72	41769.6	49.11	293542	0.875431	25.1949		647A_C26_S1_4	241.14	25.1012		23.6012	26.6012
647A_C25_S1	48.71	13604	49.08	117069	0.895893	25.8149
647A_C25_S2	48.75	49500	49.14	289812	0.854117	24.549
647A_C25_S4	48.73	25266.3	49.1	196087	0.885855	25.5108
647A_C25_S5	48.74	35219.1	49.12	209539	0.856106	24.6093
647A_C25_CC	50.61	2410.5	50.99	13950.3	0.852666	24.505
647A_C25_CC	50.25	28121.6	50.64	140759	0.833483	23.9237
647A_C26_S1_4	48.72	18288.4	49.09	124971	0.872341	25.1012
